# Supplementary material for: Building block syntheses of site-isolated vanadyl groups in silicate oxidesElectronic supplementary information (ESI) available: summary of experimental procedures, 51V NMR collection parameters, BET, IR and Raman data. See http://www.rsc.org/suppdata/cc/b3/b316184f/
Source: Royal Society of Chemistry journal article supplement (doi:10.1039/b316184f), 2004-01-01
Supplement: b316184f.doc [file b316184f.doc]

**Electronic Supplementary Information (ESI)**

Experimental evidence in support of the manuscript (**B316184F)**:

Title: **Building Block Syntheses of Site-Isolated Vanadyl Groups in Silicate Oxides**

Authors: Narendra N. Ghosh, Jason C. Clark, Geoffrey T. Eldridge, Craig E. Barnes

Email: cebarnes@utk.edu

Department of Chemistry

University of Tennessee

Knoxville, TN 37996-1600

**Experimental**

All manipulations of air sensitive compounds and solids described here were performed in standard Schlenk vessels under dry nitrogen or in a nitrogen glove box.

Si8O20(SnnBu3)8 was prepared using the procedure described by Feher (F. J. Feher and K. J. Weller *Chem. Mater.* **1994**, *6*, 7) for the trimethyltin analogue, Si8O20(SnMe3)8. Elemental Analysis: calc. (found); C 40.24 (40.40); H 7.60 (7.57); NMR (C6D6): 13C{1H} 14.2, 16.4 ppm [1J(117SnC) =356 Hz, 1J(119SnC) =373 Hz], 27.7 ppm [3J(117SnC) =60.3 Hz, 3J(119SnC) = 63.1 Hz], and 28.4 ppm [2J(119SnC) =17.8 Hz]; 29Si{1H} -101 ppm; 119Sn{1H} 85.9 ppm.

*Normal addition* procedure: A solution of VOCl3 (1.935 g, 11.2 mmol) in dry hexanes was slowly added to a solution of Si8O20(SnnBu3)8 (4.0 g, 1.4 mmol) over a period of 150 min with continuous stirring using a magnetic stirrer. The final molar ratio of Si8O20(SnnBu3)8:VOCl3 was 1 : 8. The precipitate that formed was filtered, washed with dry hexanes, methylene chloride and dried under vacuum overnight. The sample prepared by this experiment is referred to as the *normal addition* product.

*Inverse addition* procedure: A solution of VOCl3 (1.935 g, 11.12 mmol) in dry hexanes was prepared and slowly added to a solution of Si8O20(SnnBu3)8 (4.0 g, 1.4 mmol) in dry hexane over 30 min with continuous stirring. The final molar ratio of Si8O20(SnnBu3)8:VOCl3 is 1: 8. The precipitate that formed was filtered, washed with dry hexanes and dried as before. The sample prepared by this experiment is referred to as the *inverse addition* product.

*SiCl4-VOCl3* procedure: Si8O20(SnnBu3)8 (4.0 g, 11.4 mmol) were dissolved in hexanes in a dry nitrogen atmosphere. (0.73 g, 4.3 mmol) of SiCl4 were added and the solution was stirred at 70°C for 6 hours. All volatiles were removed under vacuum. Hexane was added back to dissolve the residue and 0.3g (1.72 mmol) of VOCl3 were added to the mixture. An precipitate formed immediately. Additional SiCl4 was added to the solution which was stirred overnight. The precipitate was isolated via filtration and washing under nitrogen.

51V Solid State NMR parameters for Figure 1:

Normal 1Pulse experiment with magic angle spinning without proton decoupling. 51V resonance frequency: 105.08 MHz; spinning speed for spectra shown: 7.55 kHz; pulse width used: 1μs (4.3μ 90° pulse); Sweep width: 200 KHz ; FID was multiplied by line broadening factor of 200 Hz and then zero filled to 8000 points before Fourier transform.

Figure 1: The IR spectrum of *inverse addition* product.

Figure 2: The Raman spectra of the *inverse addition* product.

Figure 3: 29Si SSNMR spectra of *normal* and *inverse addition* and *SiCl4-VOCl3* samples described in the manuscript.

Figure 4: N2 adsorption isotherm for *inverse addition* product

Silicon SSNMR spectra collected using 1Pulse sequence with magic angle spinning.

29Si resonance frequency: 79.433 MHz

Spinning speed: 3.5 kHz

Pulse used: 1.6μs (4.7 μs 90° pulse)

Line broadening: 300 Hz
